# Supplementary material for: Triphenylphosphine-assisted highly sensitive fluorescent chemosensor for ratiometric detection of palladium in solution and living cells
Source: Royal Society of Chemistry journal article supplement (doi:10.1039/c5ra17819c), 2015-01-01
Supplement: c5ra17819c1.pdf [file c5ra17819c1.pdf]

## Supporting Information for

### **Triphenylphosphine-assisted highly sensitive fluorescent chemosensor for ratiometric detection of palladium in solution and living cells**

Hailiang Nie, Junming Geng, Jing Jing, Yamin Li, Wen Yang\* and Xiaoling Zhang\*

Key Laboratory of Cluster Science of Ministry of Education, Beijing Key Laboratory of Photoelectronic/Electrophotonic Conversion Materials, School of Chemistry, Beijing Institute of Technology, 5 Zhongguancun Road, Beijing 100081, P. R. China

E-mail: wenyang@bit.edu.cn; zhangxl@bit.edu.cn;

Fax: +86-10-88875298; Tel: +86-10-88875298.

### Contents

- 1. Comparison of the analytical performances of our two chemosensors**
- 2. Analysis of the reaction mechanism by HPLC method**
- 3. Time-dependent fluorescence intensity ratio changes of chemosensor 1 during reacting with Pd<sup>2+</sup>**
- 4. Calculation for detection limit**
- 5. Cytotoxicity assays**
- 6. NMR and ESI-MS spectra of chemosensor 1 and its Pd<sup>0</sup>-catalyzed deallylation product**

## 1. Comparison of the analytical performance of our two chemosensors

**Table 1** The analytical performance of our two chemosensors

|                      | fluorescence<br>imaging | linear range<br>( $\mu\text{M}$ ) | Detection Limit<br>(nM) | $\text{Pd}^{2+}$ concentration to be<br>incubated with cells ( $\mu\text{M}$ ) |
|----------------------|-------------------------|-----------------------------------|-------------------------|--------------------------------------------------------------------------------|
| previous chemosensor | ratiometric             | 0~7                               | 70                      | 40                                                                             |
| chemosensor <b>1</b> | ratiometric             | 0.02~0.25                         | 1                       | 0.3                                                                            |

## 2. Analysis of the reaction mechanism by HPLC method

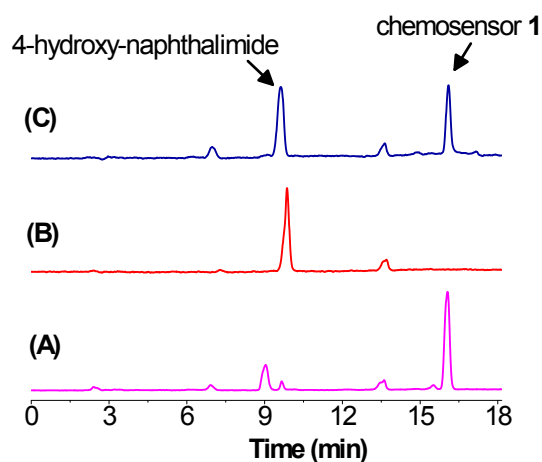

**Figure S1.** Monitoring the reaction processes by HPLC. (A) The spectral of chemosensor **1**- $\text{Pd}(\text{PPh}_3)_4$  reaction system in THF; (B) The spectral of chemosensor **1**- $\text{Pd}(\text{PPh}_3)_4$ - $\text{NaBH}_4$  reaction system in THF; (C) The spectral of chemosensor **1**- $\text{PPh}_3$ - $\text{PdCl}_2$  reaction system in PBS solution (pH=7.4). All reaction were performed for 12h and then analyzed by HPLC at 254 nm absorption wavelength. The samples were analyzed by reverse-phase HPLC with a linear gradient [C18-ST: starting eluent 50%  $\text{CH}_3\text{CN}/0.1\%$  TFA aq; final eluent 90%  $\text{CH}_3\text{CN}/0.1\%$  TFA aq.; gradient duration 10 min; flow rate = 1 mL/min].

### 3. Time-dependent fluorescence intensity ratio changes of chemosensor **1** during reacting with Pd<sup>2+</sup>

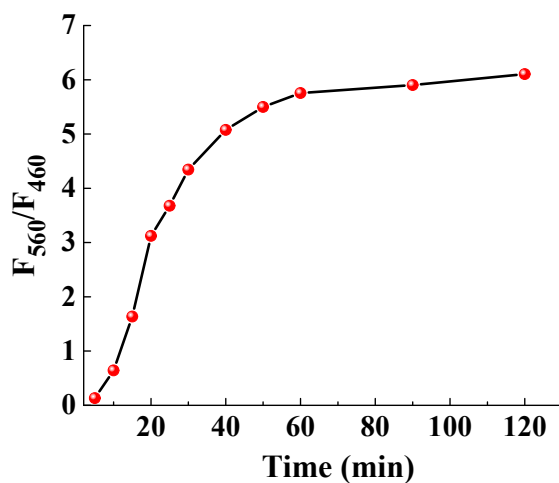

**Figure S2.** Fluorescence intensity ratios ( $F_{560\text{nm}}/F_{460\text{nm}}$ ) in PBS buffer (10 mM, pH 7.4) with reaction time of 5, 10, 15, 20, 25, 30, 40, 50, 60, 90, 120 min. The measurements were performed after reacting chemosensor **1** (5  $\mu\text{M}$ ) and PPh<sub>3</sub> (4  $\mu\text{M}$ ) with Pd<sup>2+</sup> (0.5  $\mu\text{M}$ ) at room temperature.  $\lambda_{\text{ex}} = 410$  nm.

### 4. Calculation for detection limit

The detection limit was calculated based on the fluorescence titration. In the absence of Pd<sup>2+</sup>, the fluorescence emission of chemosensor **1** was measured ten times and the standard deviation of blank measurement was obtained. To gain the slope, the logarithm of the fluorescence intensity ratio at two emission peaks,  $\log (F_{560}/F_{460})$ , was plotted versus Pd<sup>2+</sup> concentration. The detection limit was calculated according to the following equation:

$$\text{Detection limit} = 3\sigma/k$$

Where  $\sigma$  is the standard deviation of blank measurements and  $k$  is the slope of  $\log (F_{560\text{ nm}}/F_{460\text{nm}})$  versus Pd<sup>2+</sup> concentration

### 5. Cytotoxicity assays

RAW264.7 macrophage cells were cultured in culture media (DMEM) in an atmosphere of 5% CO<sub>2</sub> and 95% air at 37 °C. The cells were seeded into 96-well plates at a density of  $5 \times 10^3$  cells per well in culture media, then 5, 10 and 20  $\mu$ M chemosensor **1** (containing 4  $\mu$ M PPh<sub>3</sub>) were added respectively. Next, the cells were incubated at 37 °C in an atmosphere of 5% CO<sub>2</sub> and 95% air for 24 h. Finally, 10  $\mu$ L 3-(4,5-dimethylthiazol-2-yl)-2,5-diphenyltetrazolium bromide (MTT, 5 mg/mL) was added and were cultured for another 4 h, respectively.

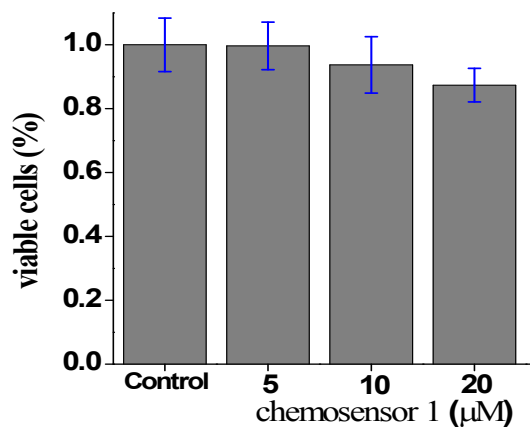

Fig. S3 Cytotoxicity assays of chemosensor **1** (containing 4  $\mu$ M PPh<sub>3</sub>) at different concentrations for RAW264.7 macrophage cells

## 6. NMR and ESI-MS spectra of chemosensor 1 and its Pd<sup>0</sup>-catalyzed deallylation product

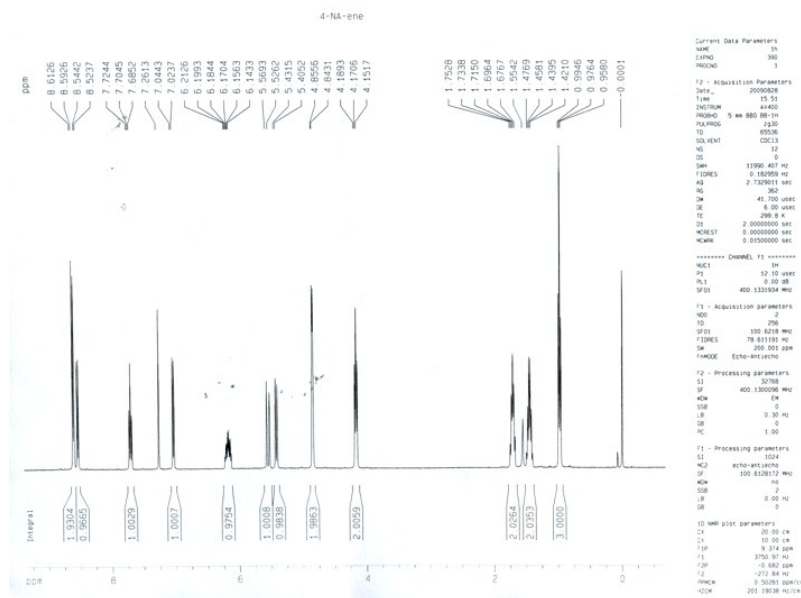

Figure S4. <sup>1</sup>H-NMR spectrum of chemosensor 1

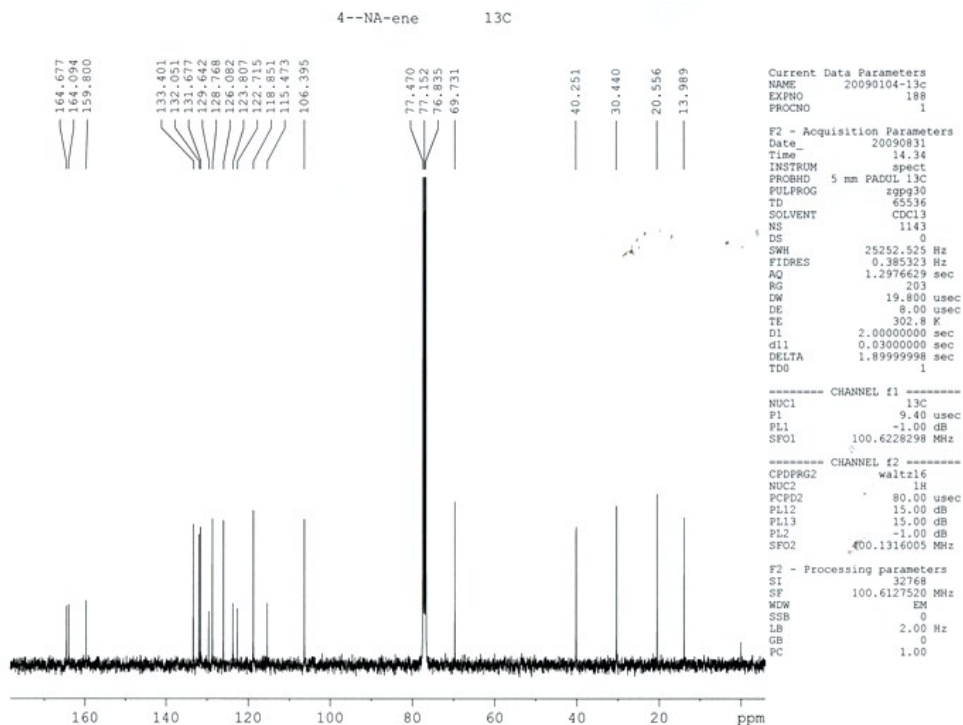

**Figure S5.  $^{13}\text{C}$ -NMR spectrum of chemosensor 1**

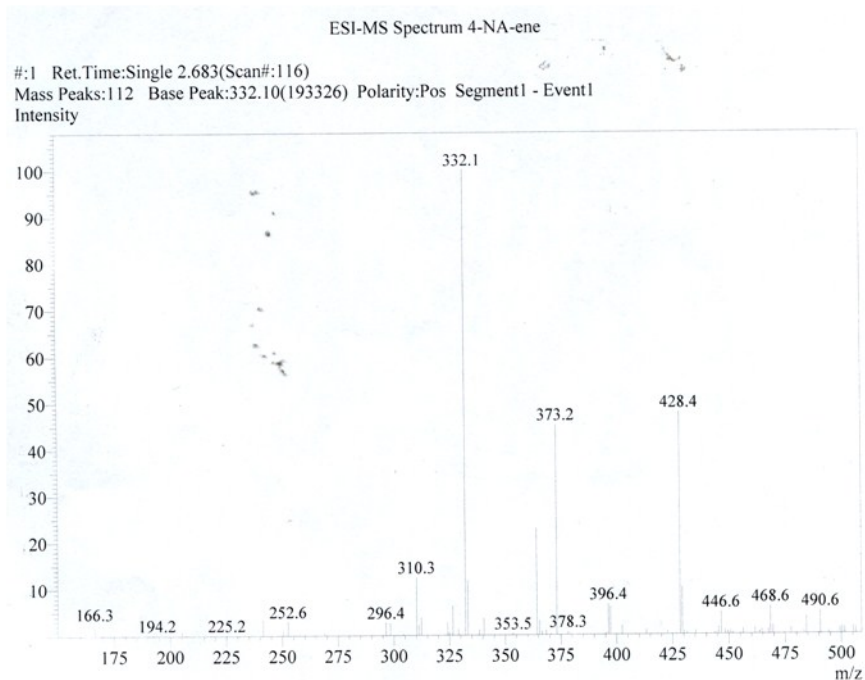

**Figure S6. ESI-MS spectrum of chemosensor 1**

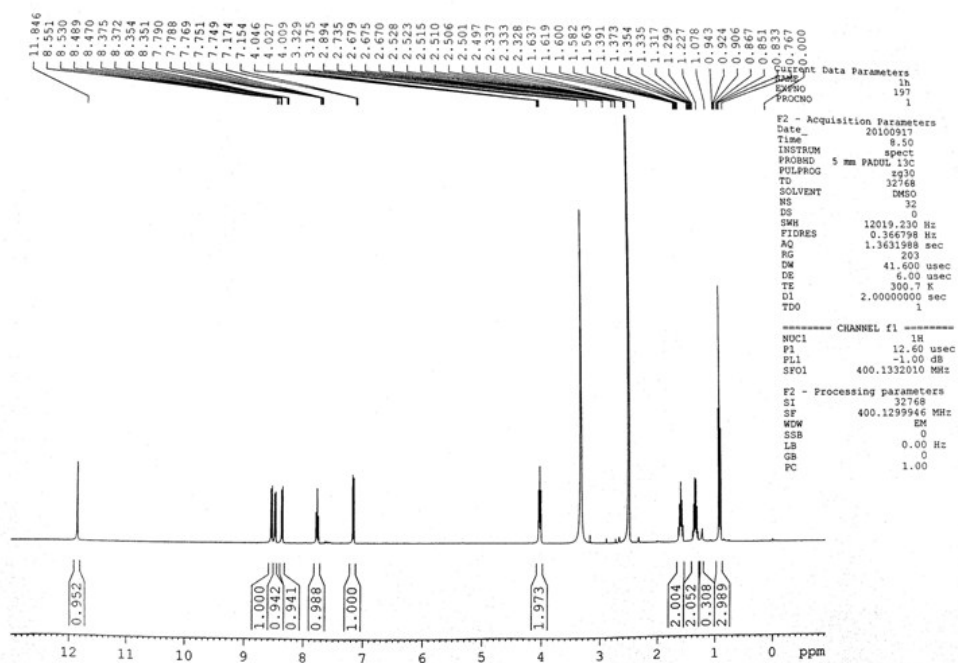

Figure S5.  $^1\text{H-NMR}$  spectrum of the  $\text{Pd}^0$ -catalyzed deallylation product

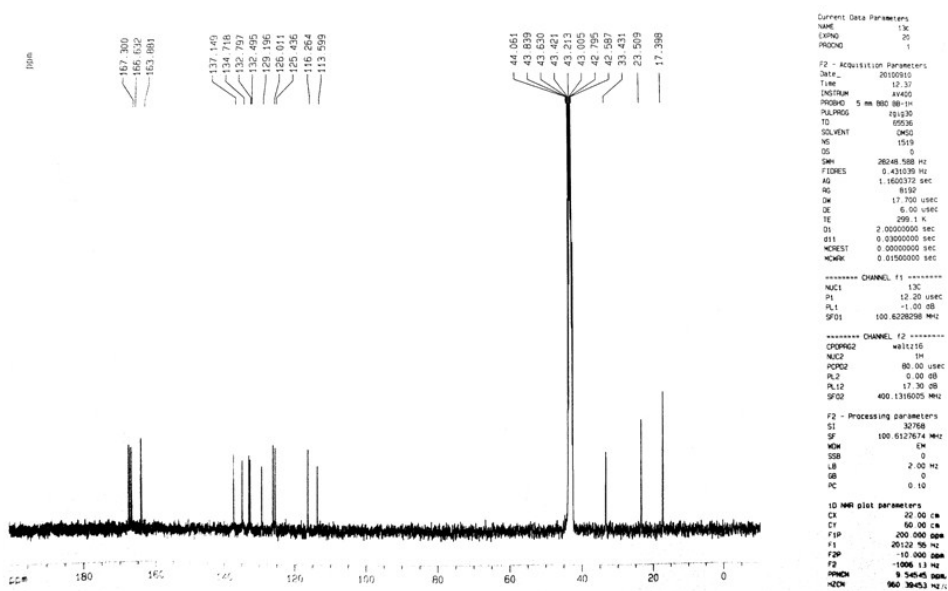

Figure S7.  $^{13}\text{C-NMR}$  spectrum of the  $\text{Pd}^0$ -catalyzed deallylation product

Peking University Mass Spectrometry Sample Analysis Report

Analysis Info  
 Analysis Name 10080211\_20100818\_000002.d Acquisition Date 8/18/2010 2:37:53 PM  
 Sample 4-OH-NA Instrument Bruker Apex IV FTMS  
 Comment ESI Positive Operator Peking University

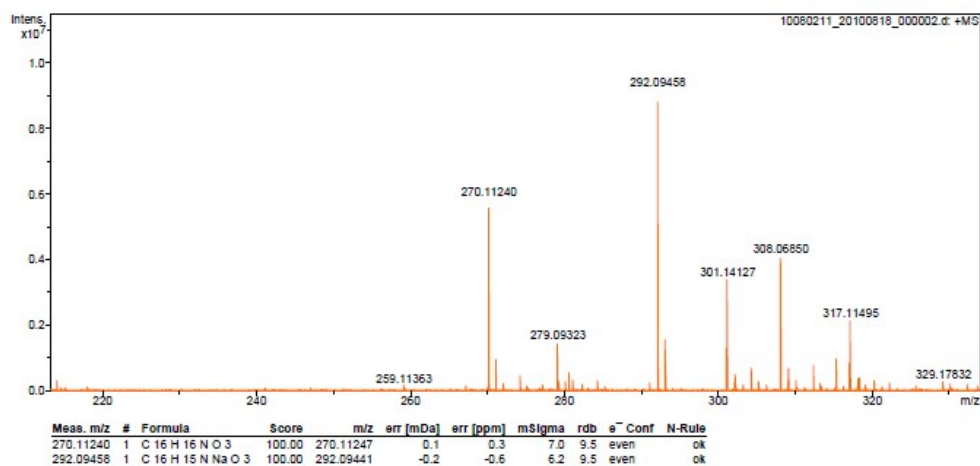

Figure S8. ESI-MS spectrum of the  $\text{Pd}^0$ -catalyzed deallylation product
